# Supplementary material for: Local BMP-SMAD1 Signaling Increases LIF Receptor-Dependent STAT3 Responsiveness and Primed-to-Naive Mouse Pluripotent Stem Cell Conversion Frequency
Source: PubMed Central journal article supplement — Stem Cell Reports. 2014 Jun 6;3(1):156–68. doi: 10.1016/j.stemcr.2014.04.019 (PMC4110772; doi:10.1016/j.stemcr.2014.04.019), 2014-06-06
Supplement: mmc1.pdf [file mmc1.pdf]

Stem Cell Reports, Volume 3

Supplemental Information

**Local BMP-SMAD1 Signaling Increases LIF Receptor-  
Dependent STAT3 Responsiveness and Primed-to-Naive  
Mouse Pluripotent Stem Cell Conversion Frequency**

Kento Onishi, Peter D. Tonge, Andras Nagy, and Peter W. Zandstra

Figure S1

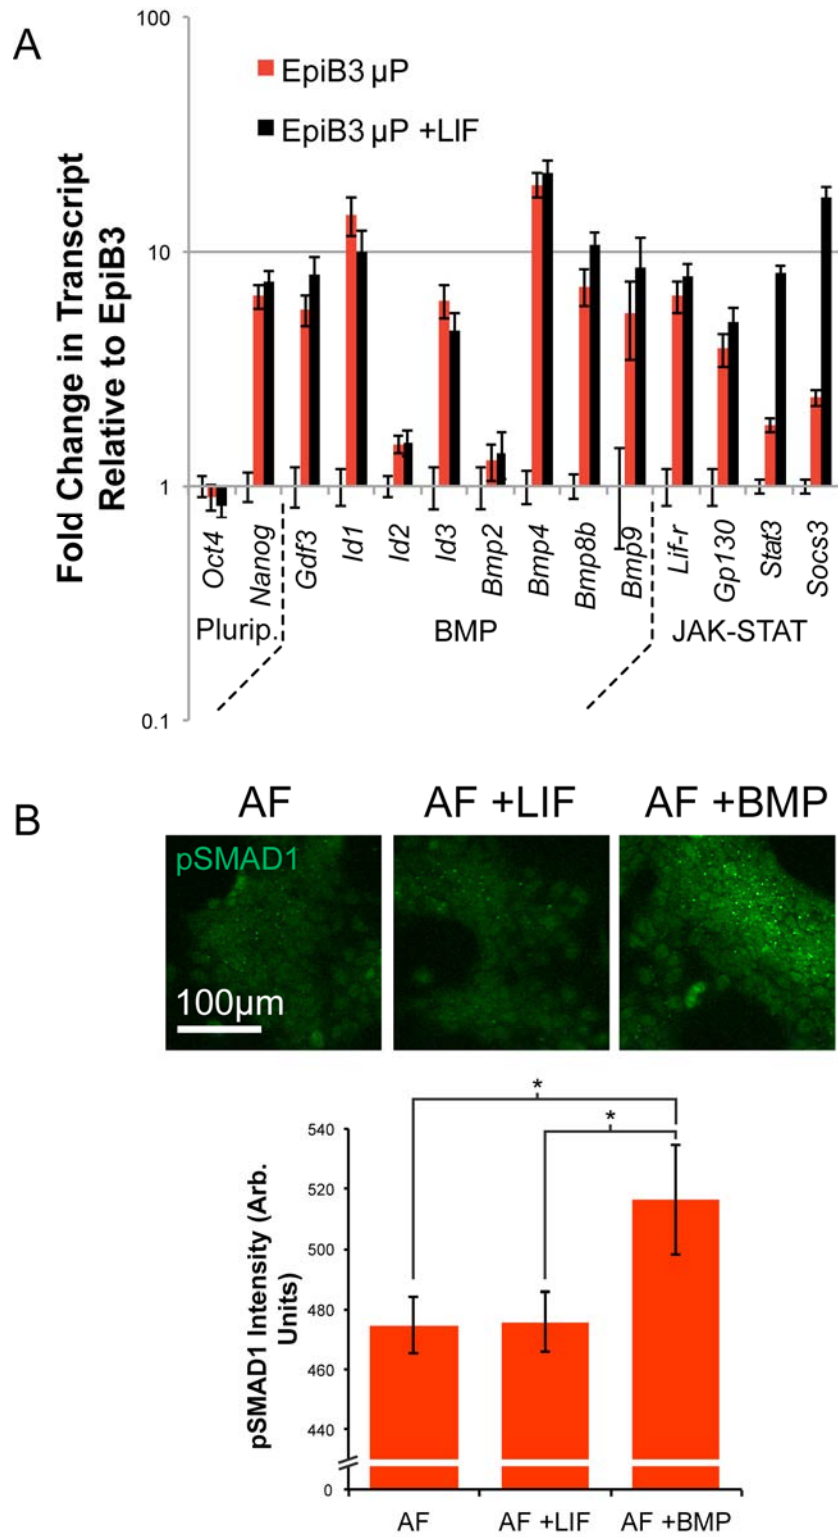

**Figure S1. BMP gene expression in EpiB3 after  $\mu$ P, Related to Figure 1.** A) EpiB3 cells were  $\mu$ P and assayed for gene expression of Pluripotency genes (Plurip.) *Oct4* and

*Nanog*, BMP-signaling genes, *Gdf3*, *Id1*, *Id2*, *Id3*, *BMP2*, *4*, *8*, and *9*, and JAK-STAT genes, *Lif-r* and *Socs3* normalized to housekeeping gene, *Gapdh*. Representative plot, error bars represent standard deviation n=3 technical replicates (3 wells). B) LIF alone does not activate SMAD1 signaling in non-patterned EpiSCs. Representative plot, error bars represent standard deviation n=6 technical replicates (6 wells). \*p<0.05 as measured by two-tailed student's t-test.

Figure S2

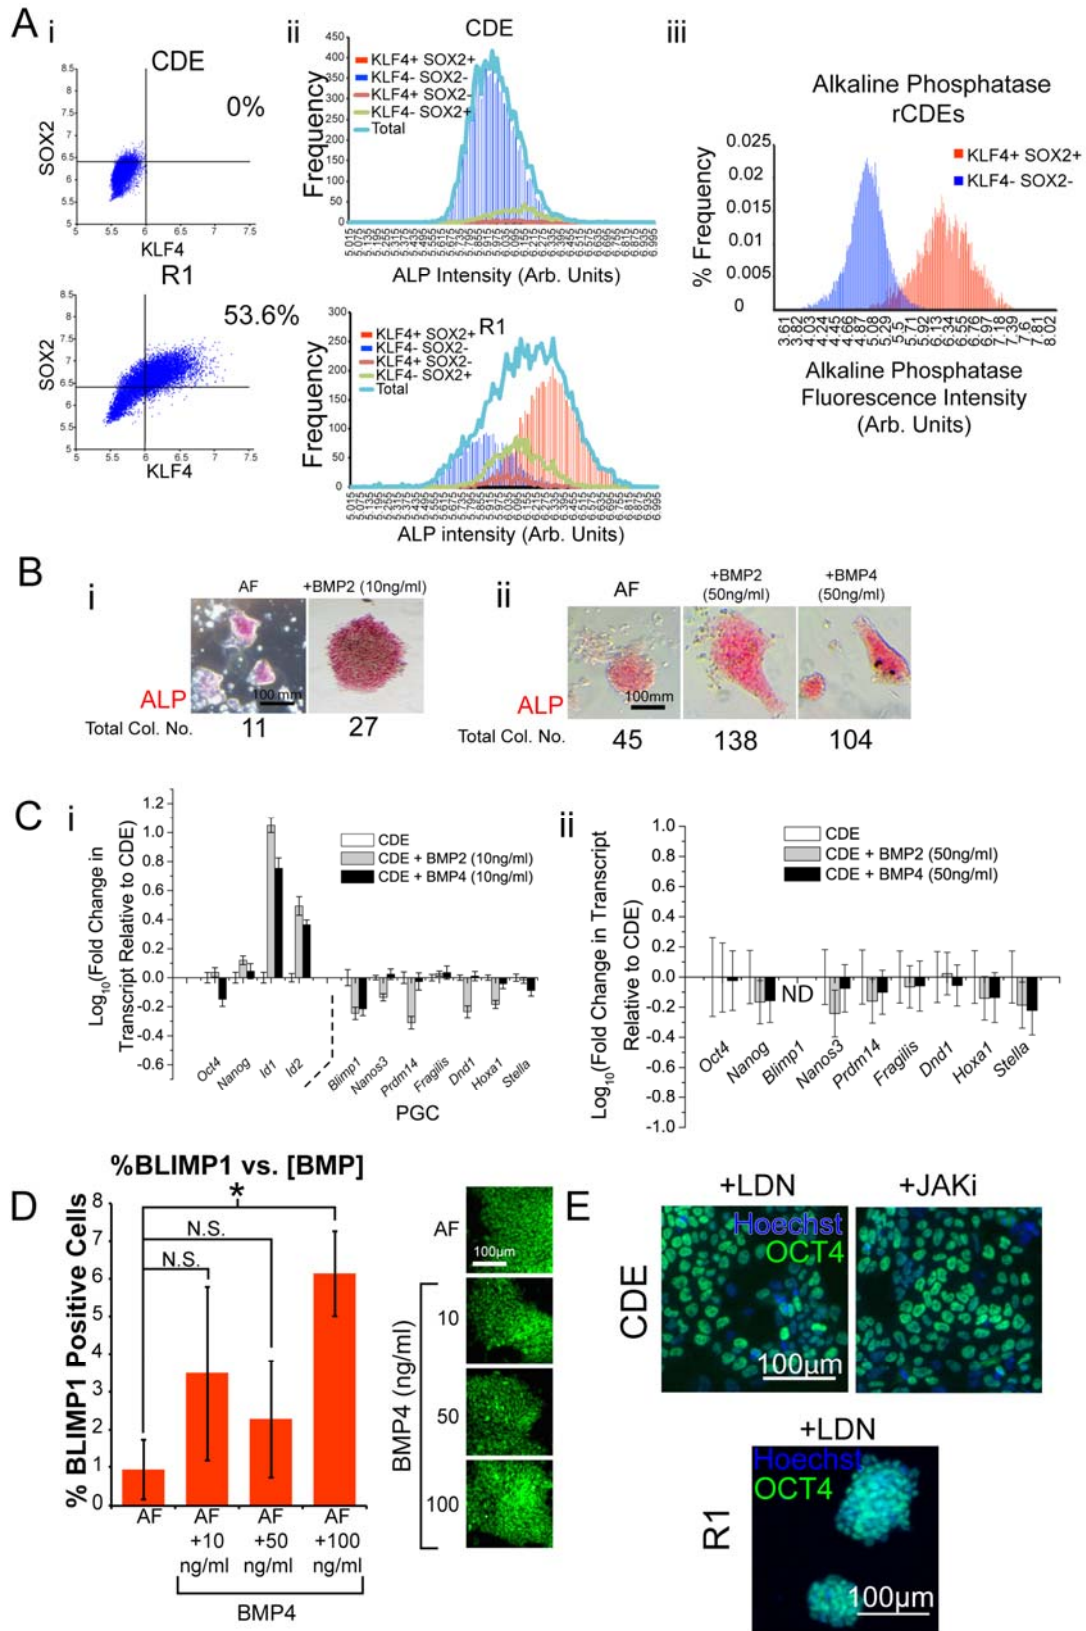

**Figure S2. BMP2 or 4 exert similar effects on EpiSCs without upregulation of PGC genes, Related to Figure 2.** A) i) Expression of KLF4 and SOX2 in EpiSCs (CDE) vs mESCs (R1) demonstrates the total absence of double positive cells (0% s. 53.6%, respectively) ii) Total population-level ALP expression (cyan line) divided into sub-populations of KLF4-SOX2 double positive (DP - red bars), double negative (DN - blue bars), and single positive (green and red lines) demonstrates high ALP expression correlates with DP cells and low expression with DN cells. iii) Similar results for a population of reverted CDEs. ALP expression is only observed in DP cells. B) i) ALP positive colonies emerge at a higher frequency from CDEs treated for 1 day with 10ng/ml BMP2 than from untreated CDEs. Total colony count (Total Col. No.) listed below images. ii) The same experiment was performed with a higher concentration of BMP4 (50ng/ml). Increased ALP colonies formation relative to baseline is again observed upon 50ng/ml of BMP2 or BMP4 treatment for one day prior to seeding in 2iL. Total colony count (Total Col. No.) listed below images. C) qRT-PCR on CDEs demonstrates a lack of primordial germ cell (PGC) genes that emerge as a result of BMP2 or BMP4 i) 10ng/ml treatment or ii) 50ng/ml for one day. ND - not detected in any sample D) Percentage of BLIMP1 positive cells as assayed by immunostaining of cells cultured in Activin A and FGF media (AF) supplemented with 10ng/ml, 50ng/ml, or 100ng/ml of BMP4. Representative images of BLIMP1 staining shown for these conditions. E) CDEs were able to maintain Oct4 levels in long-term (5 passages) culture in 3 $\mu$ M LDN-193189 (LDN), a BMP4 inhibitor, or 2 $\mu$ M JAK inhibitor (JAKi). Similarly, R1 cells maintain Oct4 expression upon culture in 0.1  $\mu$ M LDN in 2iL media. Error bars in panels C and D represent standard deviations of n=3 technical replicates (wells within the same experiment). Significance determined by two-tailed student's T-test. \*p<0.05.

Figure S3

A i

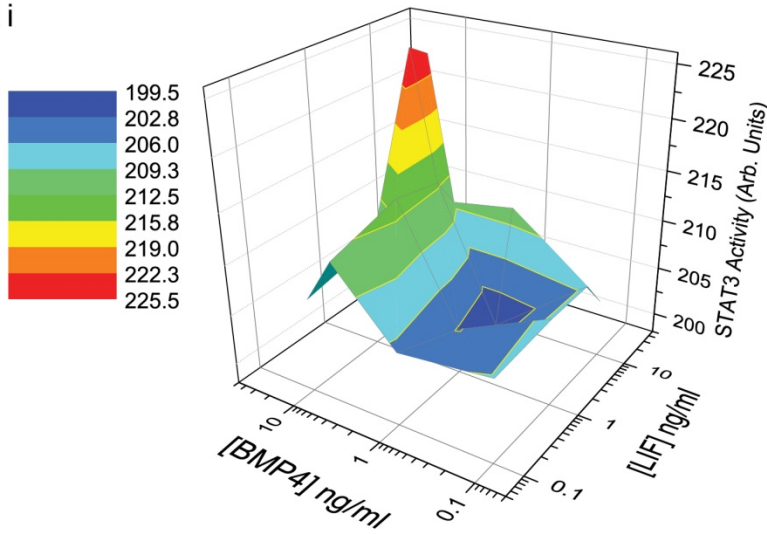

ii

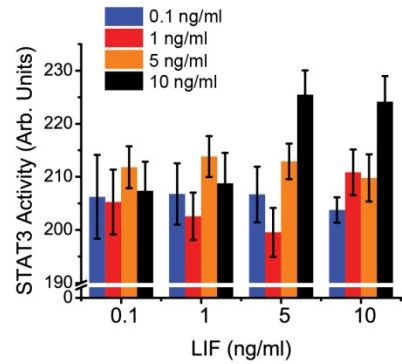

B

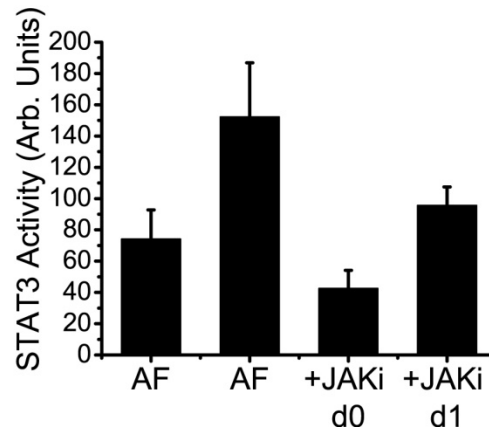

**Figure S3. Dose curve of LIF and BMP4 reveals threshold of BMP signaling to recover LIF responsiveness in EpiSCs, Related to Figure 3.** A) Treatment with 0.1, 1, 5, or 10ng/ml of each of LIF or BMP4 and subsequent measurement of LIF responsiveness (STAT3 activation) in EpiSCs depicted as a i) 3D surface and as ii) a set of bar graphs. B) JAKi was administered to  $\mu$ P EpiSCs at the seeding step (d0) or 1 day after seeding (d1) and assayed for LIF responsiveness. Error bars represent standard deviation  $n=4$  in A and  $n=6$  in B of technical replicates (wells within the same experiment).

Figure S4

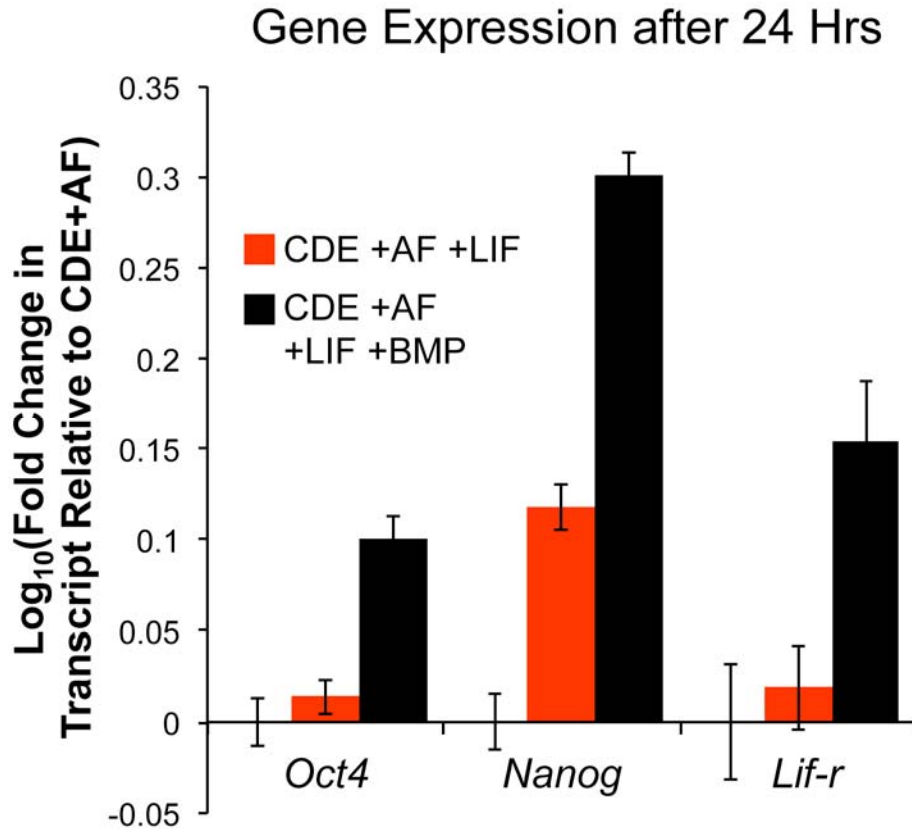

**Figure S4. Transcription of *Oct4*, *Nanog*, and *Lif-r* in response to LIF and/or BMP in 24hrs, Related to Figure 4.** Treatment with LIF alone for 24 hrs (red bars) does not result in a significant increase in transcription of *Lif-r*. In contrast, LIF and BMP (black bars) in combination result in robust transcription of *Lif-r*. *Oct4* and *Nanog* remain at or above levels observed in CDEs (Baseline – Y=0) demonstrating maintenance of population-level pluripotency during this treatment period. Representative plot, n=3 technical replicates, error bars represent standard deviation.

Table S1

| Primer name      | Forward               | Reverse                 | Amplicon Size |
|------------------|-----------------------|-------------------------|---------------|
| LIF-R-enh_chip   | CGAGGTATTCCAGGGCCAAG  | AGTTCAGGGTCAAATATGAGGCA | 373           |
| LIF-R-pro1_chip1 | GGTAGGGGACACAAGCAAGA  | TGACCCACATGACAGTGACC    | 411           |
| LIF-R-pro1_chip2 | GCTGTGAGTTGGTTTGCTCC  | ATAAGACAGAATGCCCCGCT    | 492           |
| LIF-R-pro1_chip3 | AGCGGGGCATTCTGTCTTAT  | GTAAGTGGCTGCCAAGGTCT    | 423           |
| LIF-R-pro1_chip4 | TGTTAGCCCTCAAACCAGGG  | TGTCTCCAAGCTTTCTCAGTT   | 418           |
| LIF-R-pro1_chip5 | ACTGAGAAAGCTTGGAGACAA | GCACAGCTTAACACACCCAG    | 552           |
| LIF-R-pro2_chip1 | ACAAGTGTATTCCCCTGGGC  | AGCAAAGGGGACAGCCATAA    | 503           |
| LIF-R-pro2_chip2 | TCATGGCACGTCTGTCTTGT  | GCACAGAGAACCAAGGACCA    | 471           |
| LIF-R-pro2_chip3 | GTTTCATGCCGAGTCTCCCTC | TCGGGCTTCCCATTTGAGAC    | 478           |
| LIF-R-pro2_chip4 | GTCTCAAATGGGAAGCCCGA  | AGCTTGCCGTTTGCTTTGAG    | 430           |

**Table S1. Primers used for CHIP on regions upstream of *Lif-r*, Related to Figure 4.**
